# Supplementary material
Source: HighWire-hosted journal article supplement (http://dmd.aspetjournals.org/highwire/filestream/66401/field_highwire_adjunct_files/0/059576_Revision_Supplemental.pdf)
Supplement: 059576_Revision_Supplemental.pdf [file 059576_Revision_Supplemental.pdf]

**Supplemental Material to:**

**Paroxetine markedly increases plasma concentrations of ophthalmic timolol; CYP2D6 inhibitors may increase the risk of cardiovascular adverse effects of 0.5% timolol eye drops**

*Jukka Mäenpää, Marjo Volotinen-Maja, Hannu Kautiainen, Mikko Neuvonen, Mikko Niemi, Pertti J. Neuvonen, Janne T. Backman*

*Drug Metabolism & Disposition*

**Contents:**

- Supplemental Table 1
- Supplemental Figures 1 to 4

**Supplemental Table 1.** The baseline and average (0-12 hours) systolic and diastolic blood pressures and heart rate after administration of a single dose of 0.1% eye gel or 0.5% eye drop to both eyes after oral pretreatment with placebo or 20 mg paroxetine daily for 3 days in 12 healthy male volunteers.

| Variable                               | Eye gel 0.1%                |                      |                          | Eye drop 0.5% |                             |                      |                          |         |
|----------------------------------------|-----------------------------|----------------------|--------------------------|---------------|-----------------------------|----------------------|--------------------------|---------|
|                                        | Placebo (control) mean (SD) | Paroxetine mean (SD) | Difference mean (95% CI) | P-value       | Placebo (control) mean (SD) | Paroxetine mean (SD) | Difference mean (95% CI) | P-value |
| <b>Systolic blood pressure (mmHg)</b>  |                             |                      |                          |               |                             |                      |                          |         |
| Baseline                               | 126 (10)                    | 127 (9)              | 2 (-3 to 7)              | 0.45          | 123 (8)                     | 130 (8)              | 7 (3 to 11)              | 0.0031  |
| Average (0-12 h)                       | 127 (8)                     | 131 (8)              | 5 (1 to 8)               | 0.012         | 127 (8)                     | 131 (10)             | 4 (1 to 7)               | 0.016   |
| <b>Diastolic blood pressure (mmHg)</b> |                             |                      |                          |               |                             |                      |                          |         |
| Baseline                               | 76 (8)                      | 78 (5)               | 1 (-3 to 5)              | 0.45          | 73 (8)                      | 76 (5)               | 3 (-3 to 8)              | 0.30    |
| Average (0-12 h)                       | 74 (6)                      | 76 (5)               | 2 (1 to 4)               | 0.0069        | 73 (5)                      | 77 (8)               | 4 (1 to 6)               | 0.025   |
| <b>Heart rate (bpm)</b>                |                             |                      |                          |               |                             |                      |                          |         |
| Baseline                               | 63 (12)                     | 63 (6)               | 0 (-7 to 7)              | 0.96          | 63 (9)                      | 62 (5)               | -1 (-5 to 4)             | 0.67    |
| Average (0-12 h)                       | 60 (6)                      | 59 (5)               | 0 (-3 to 2)              | 0.75          | 60 (8)                      | 58 (7)               | -2 (-4 to -1)            | 0.011   |

The average values were calculated by dividing the  $AUC_{0-12h}$  of the blood pressure or heart rate values by 12 hours.

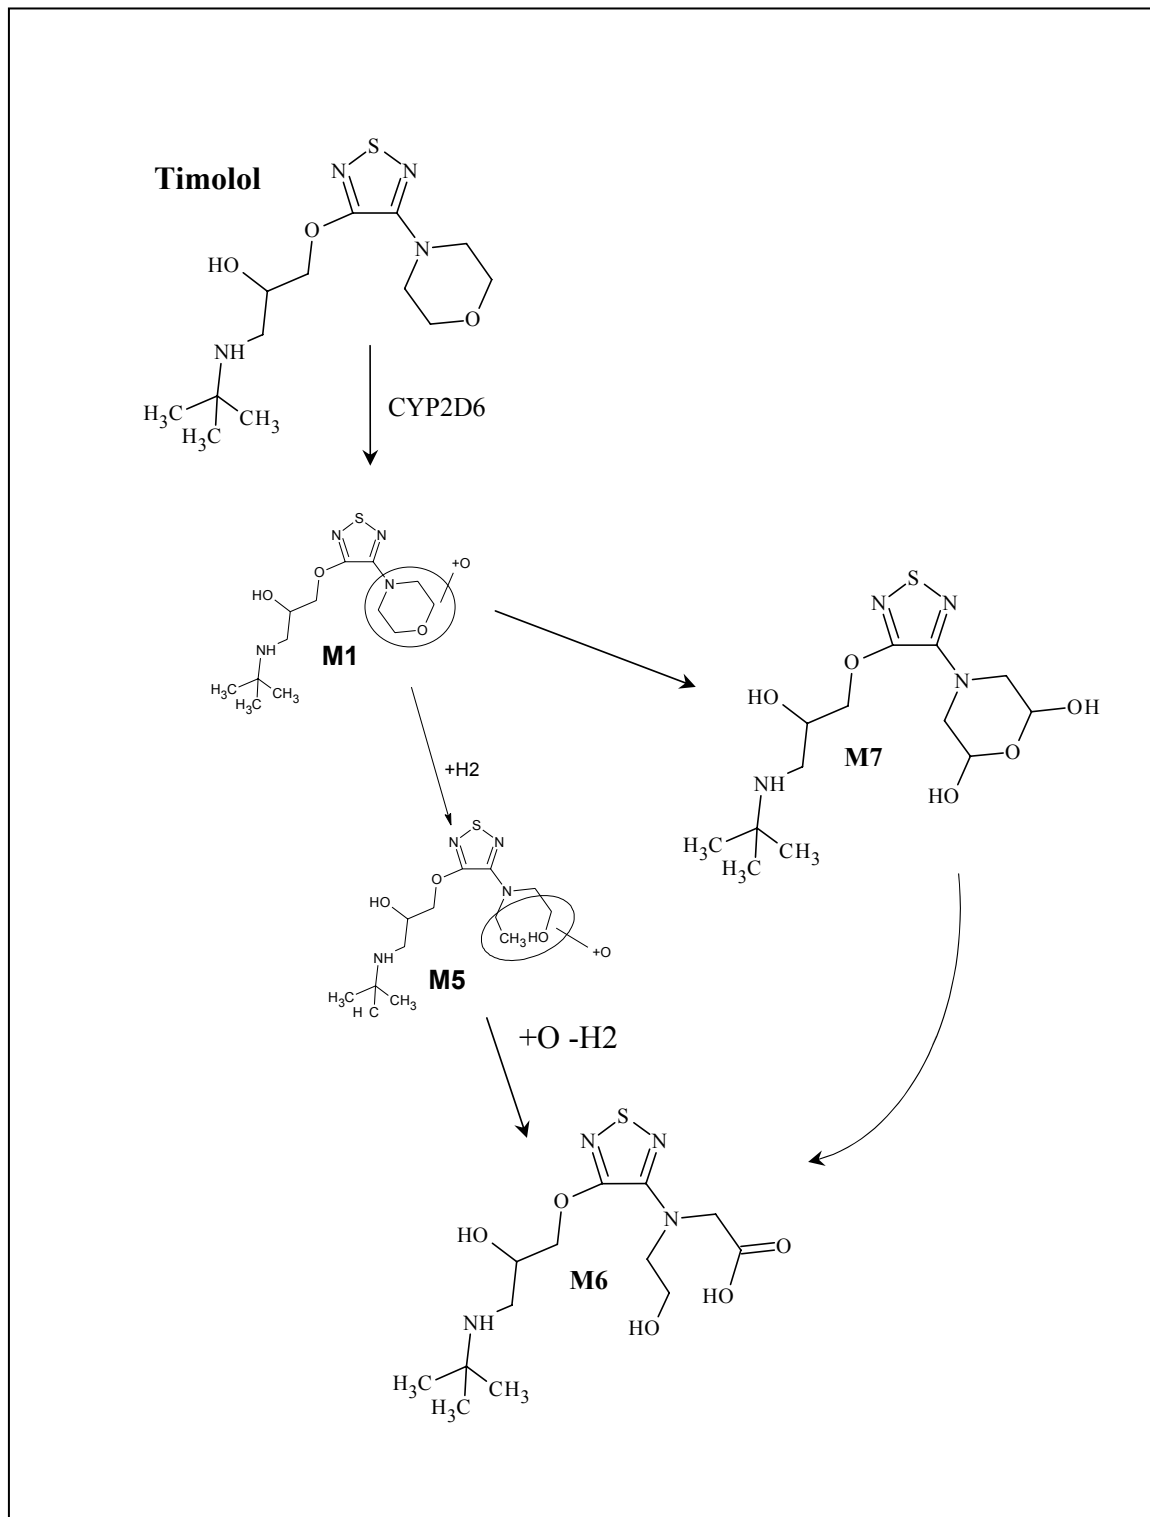

**Supplemental Figure 1** The suggested formation routes of timolol metabolites M6 and M7 according to Volotinen et al. (2010). Volotinen M, Korjamo T, Tolonen A, Turpeinen M, Pelkonen O, Hakkola J and Mäenpää J (2010) Effects of selective serotonin reuptake inhibitors on timolol metabolism in human liver microsomes and cryo-preserved hepatocytes. *Basic Clin. Pharmacol. Toxicol.* **106**:302-309.

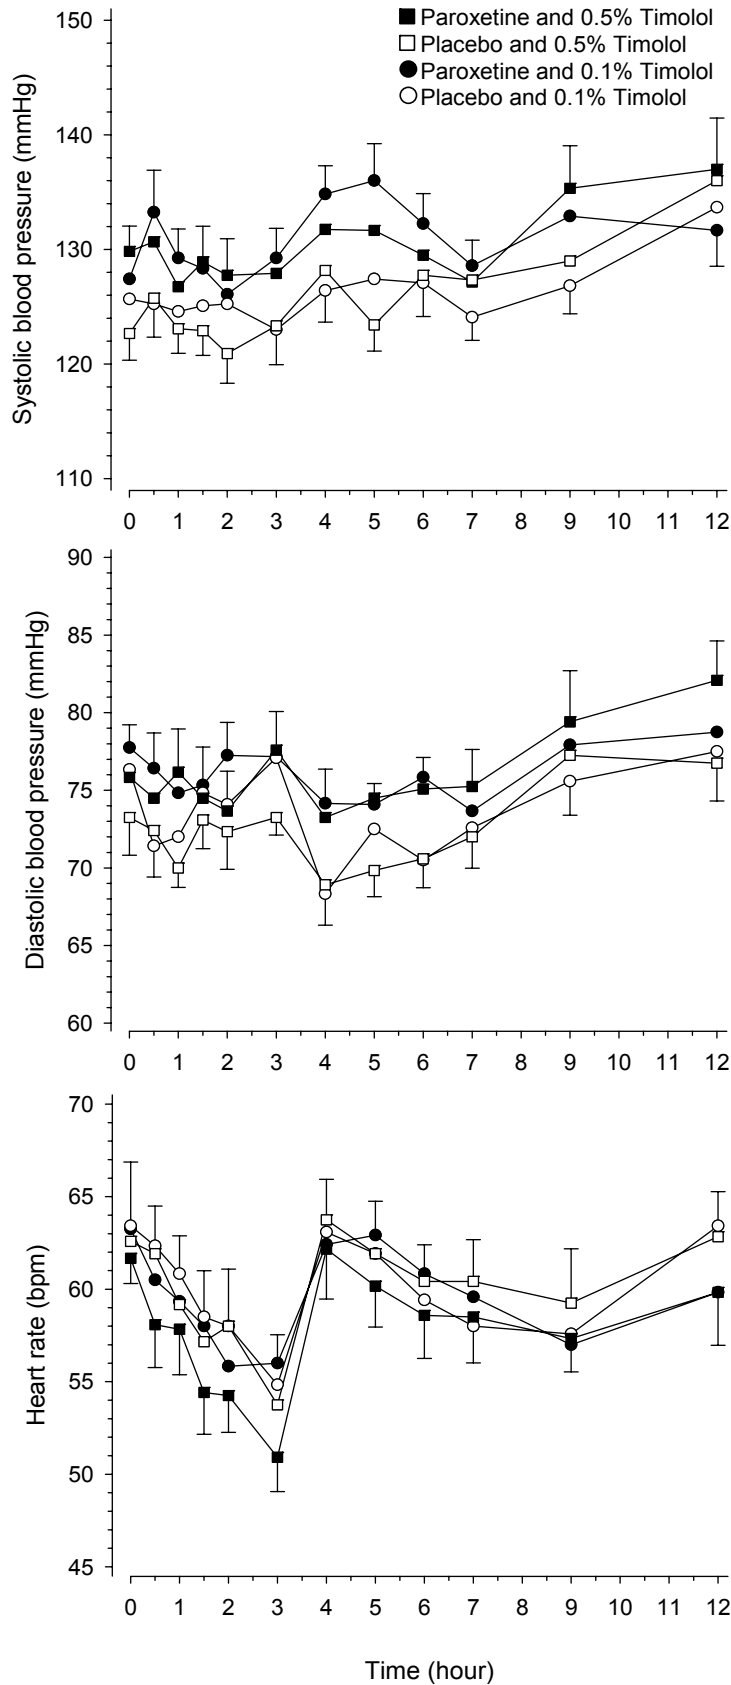

**Supplemental Figure 2** Mean ( $\pm$  standard error) systolic and diastolic blood pressures and heart rate in sitting position after ophthalmic timolol administration in a 4-phase cross-over study in 12 healthy male volunteers. The participants ingested first in a randomized order paroxetine 20 mg or placebo daily for 3 days (phases 1 and 2). On day 3, timolol 0.1% gel was applied on both eyes. During phases 3 and 4, the same 12 participants ingested in randomized fashion paroxetine or placebo, but on day 3, timolol 0.5% aqueous drop was applied on both eyes. Timed measurements continued during each phase up to 12 h after timolol application.

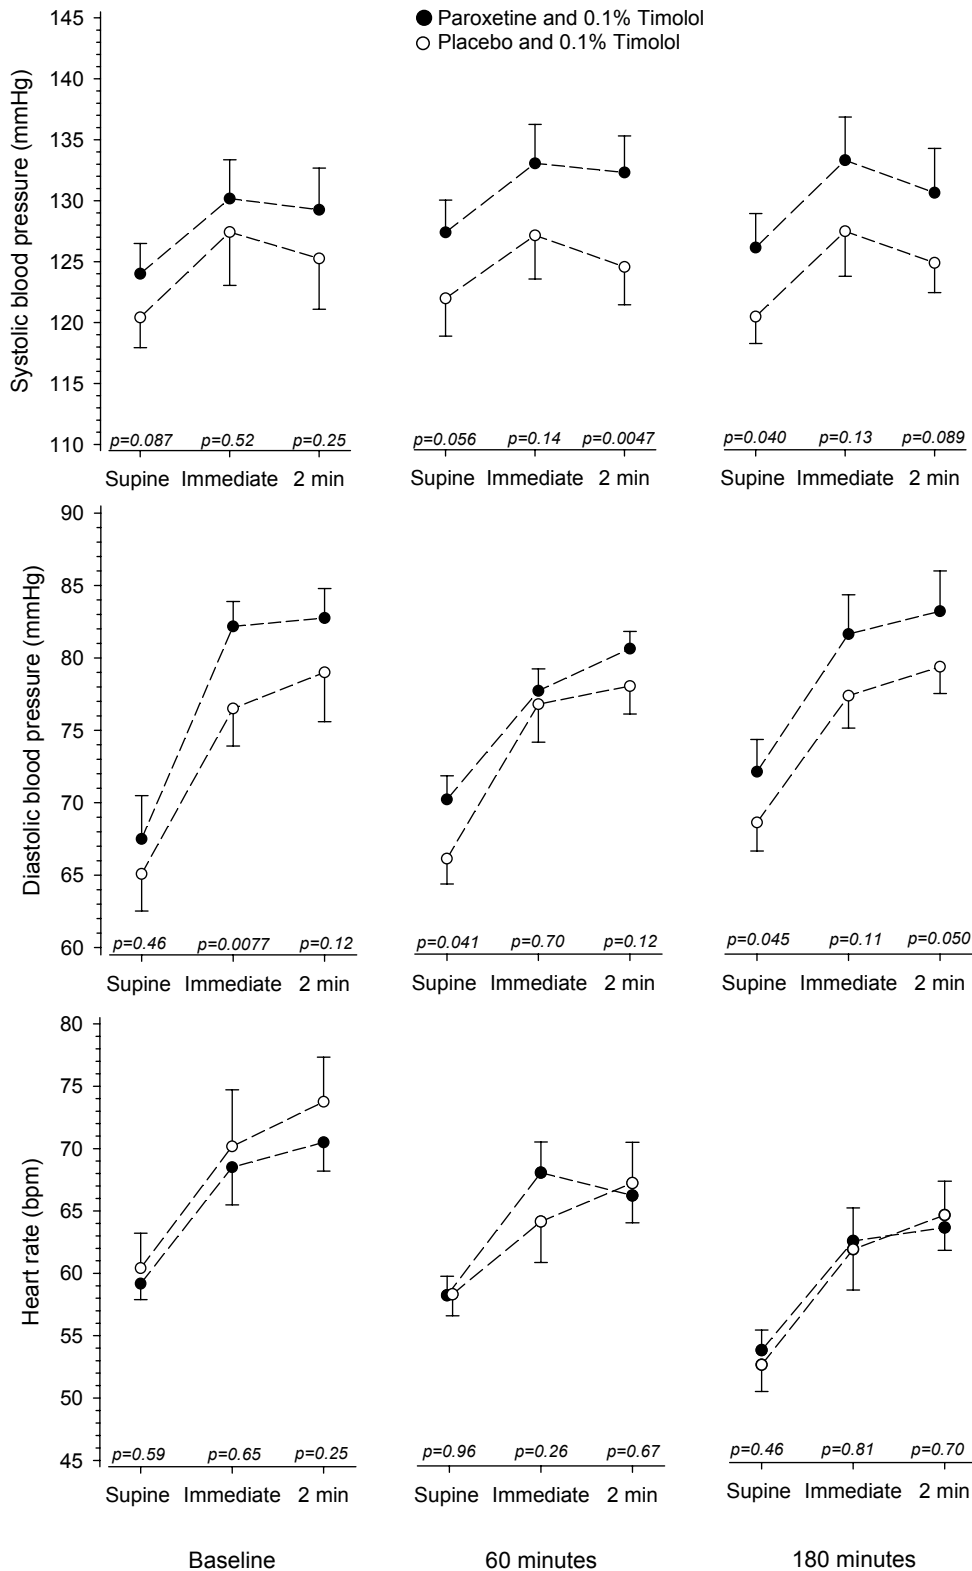

**Supplemental Figure 3** Orthostatic test blood pressure and heart rate values in 12 healthy male participants before administration of 0.1% timolol hydrogel and at 60 minutes and 180 minutes postdose during the placebo and paroxetine phases (phases 3 and 4). The 12 participants ingested in a randomized order paroxetine 20 mg or placebo daily for 3 days. On day 3, timolol 0.1% hydrogel was applied on both eyes. Blood pressures and heart rate were measured at rest in supine position, immediately after upright standing and 2 min after upright standing. Mean values and standard errors are shown.

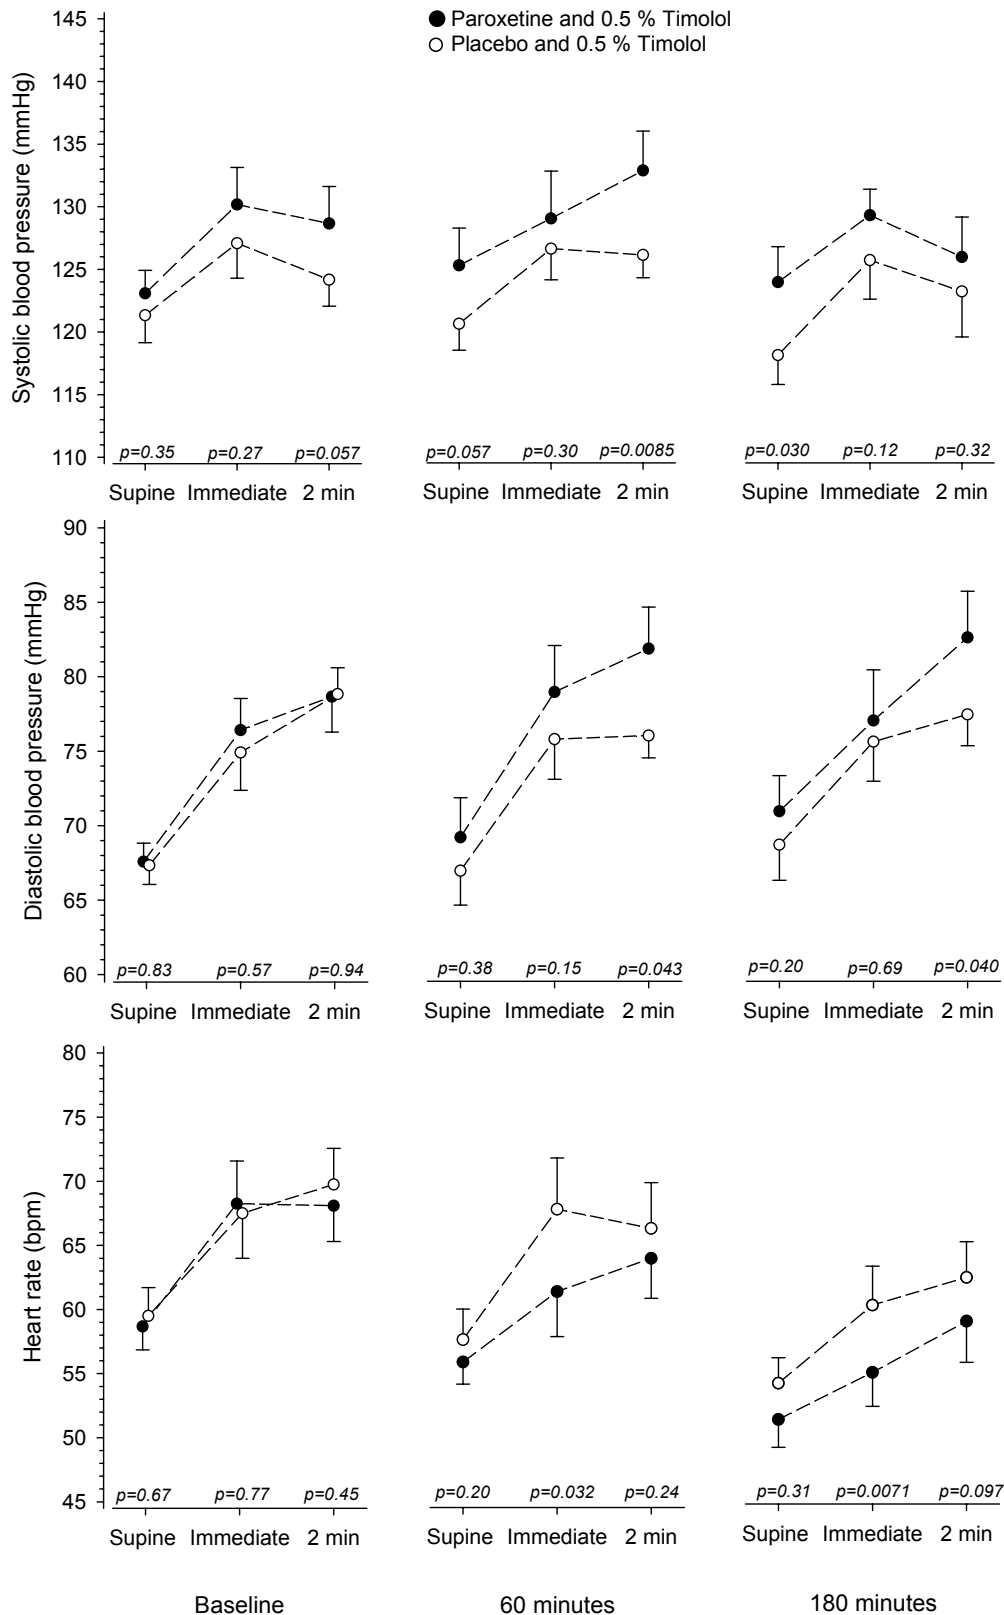

**Supplemental Figure 4** Orthostatic test blood pressure and heart rate values in 12 healthy male participants before administration of 0.5% timolol aqueous eye drops and at 60 minutes and 180 minutes postdose during the placebo and paroxetine phases (phases 3 and 4). The 12 participants ingested in a randomized order paroxetine 20 mg or placebo daily for 3 days. On day 3, timolol 0.5% aqueous drop was applied on both eyes. Blood pressures and heart rate were measured at rest in supine position, immediately after upright standing and 2 min after upright standing. Mean values and standard errors are shown.
